# Supplementary material for: Launching a CDMO in Brazil aiming to develop biopharmaceuticals for clinical trials
Source: PubMed Central journal article supplement (PMC9171928; doi:10.1590/1678-9199-jvatitd-2022-0017), 2022-06-06
Supplement: 1678-9199-jvatitd-28-e20220017-s2.pdf [file 1678-9199-jvatitd-28-e20220017-s2.pdf]

**Supplementary Material to "Launching a CDMO in Brazil aiming to develop biopharmaceuticals for clinical trials"**

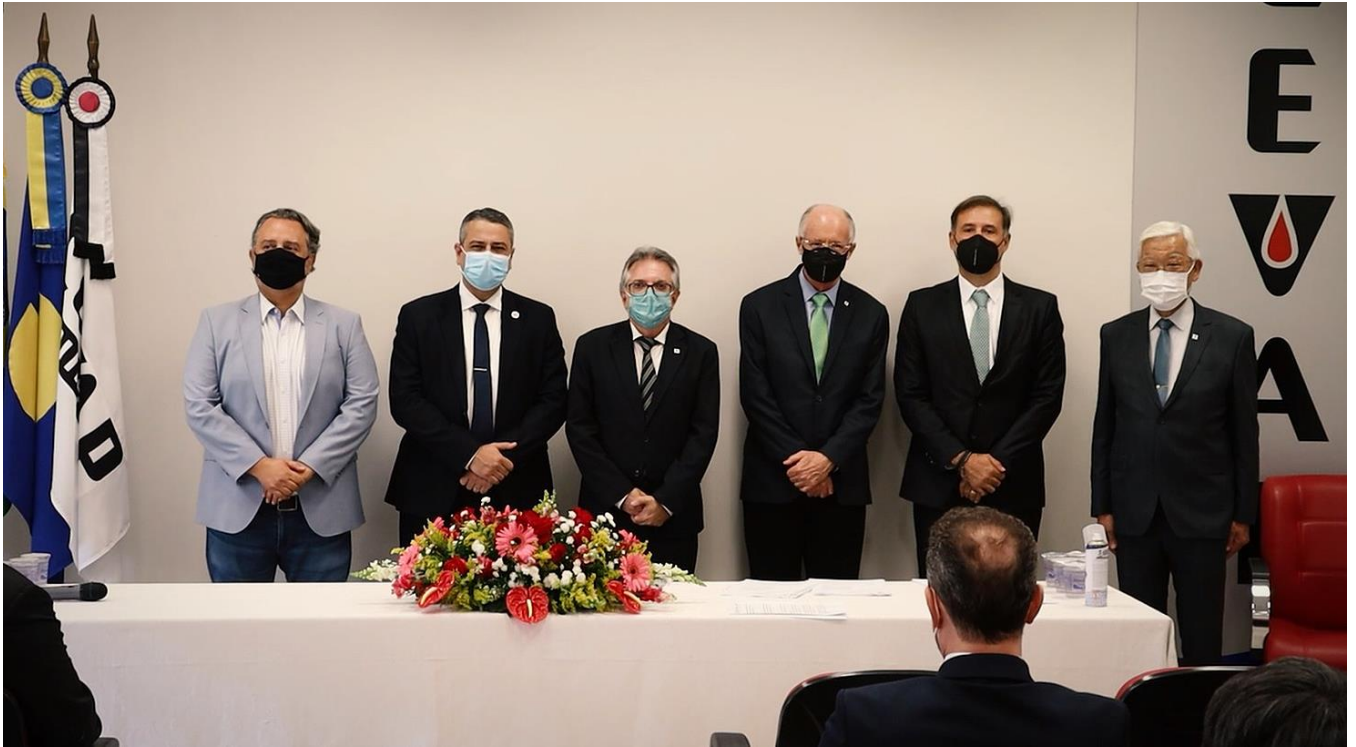

**Additional file 2.** Signing of the contract for the construction of the CDMO in January 2022 at CEVAP/UNESP in Botucatu, SP, Brazil.
