# Supplementary material for: Launching a CDMO in Brazil aiming to develop biopharmaceuticals for clinical trials
Source: PubMed Central journal article supplement (PMC9171928; doi:10.1590/1678-9199-jvatitd-2022-0017), 2022-06-06
Supplement: 1678-9199-jvatitd-28-e20220017-s3.pdf [file 1678-9199-jvatitd-28-e20220017-s3.pdf]

## Supplementary Material to "Launching a CDMO in Brazil aiming to develop biopharmaceuticals for clinical trials"

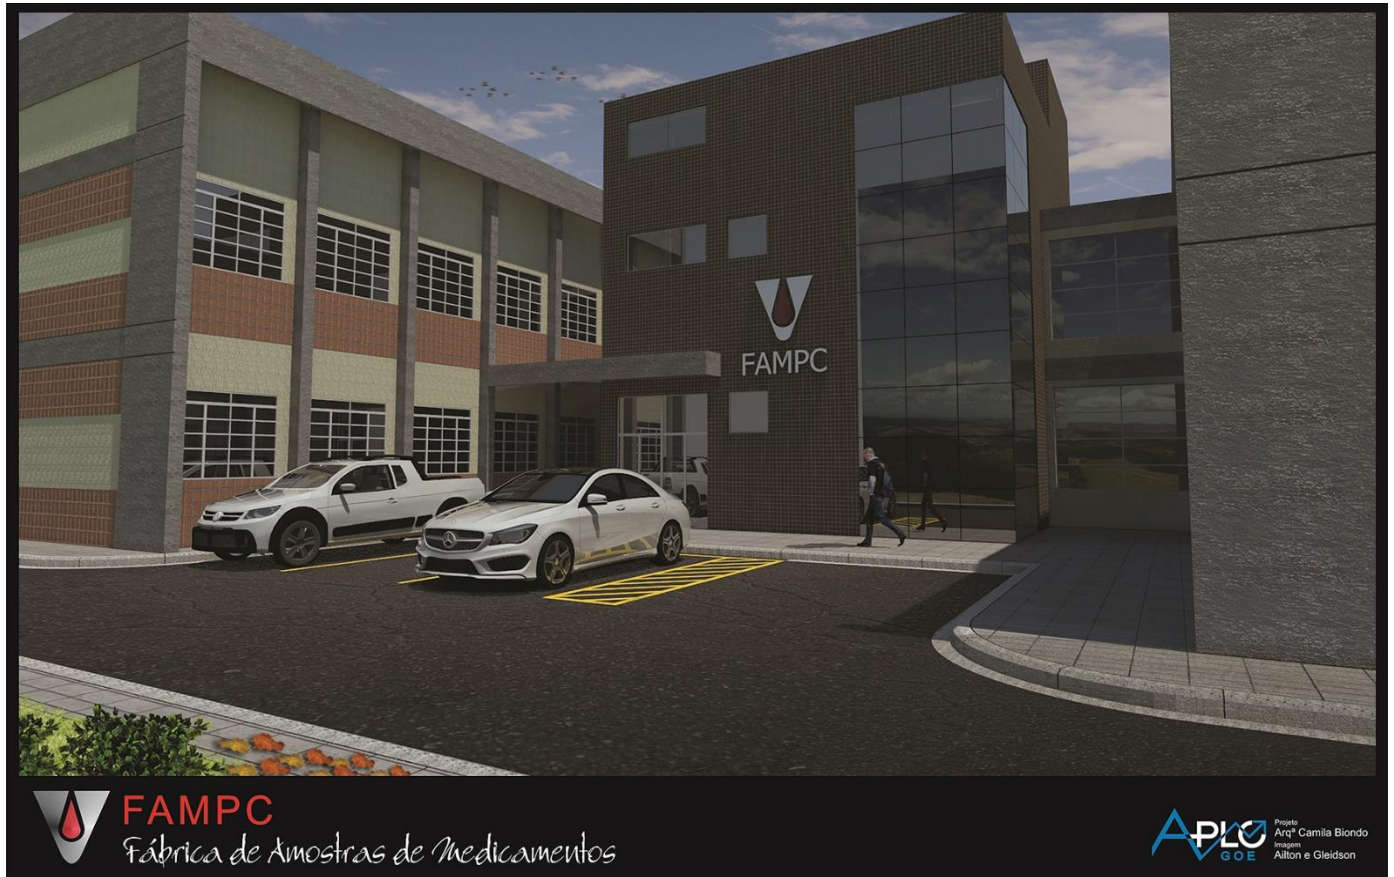

**Additional file 3.** Front 3D image of the CDMO of CEVAP/UNESP.
