# Supplementary material for: Launching a CDMO in Brazil aiming to develop biopharmaceuticals for clinical trials
Source: PubMed Central journal article supplement (PMC9171928; doi:10.1590/1678-9199-jvatitd-2022-0017), 2022-06-06
Supplement: 1678-9199-jvatitd-28-e20220017-s4.pdf [file 1678-9199-jvatitd-28-e20220017-s4.pdf]

**Supplementary Material to "Launching a CDMO in Brazil aiming to develop biopharmaceuticals for clinical trials"**

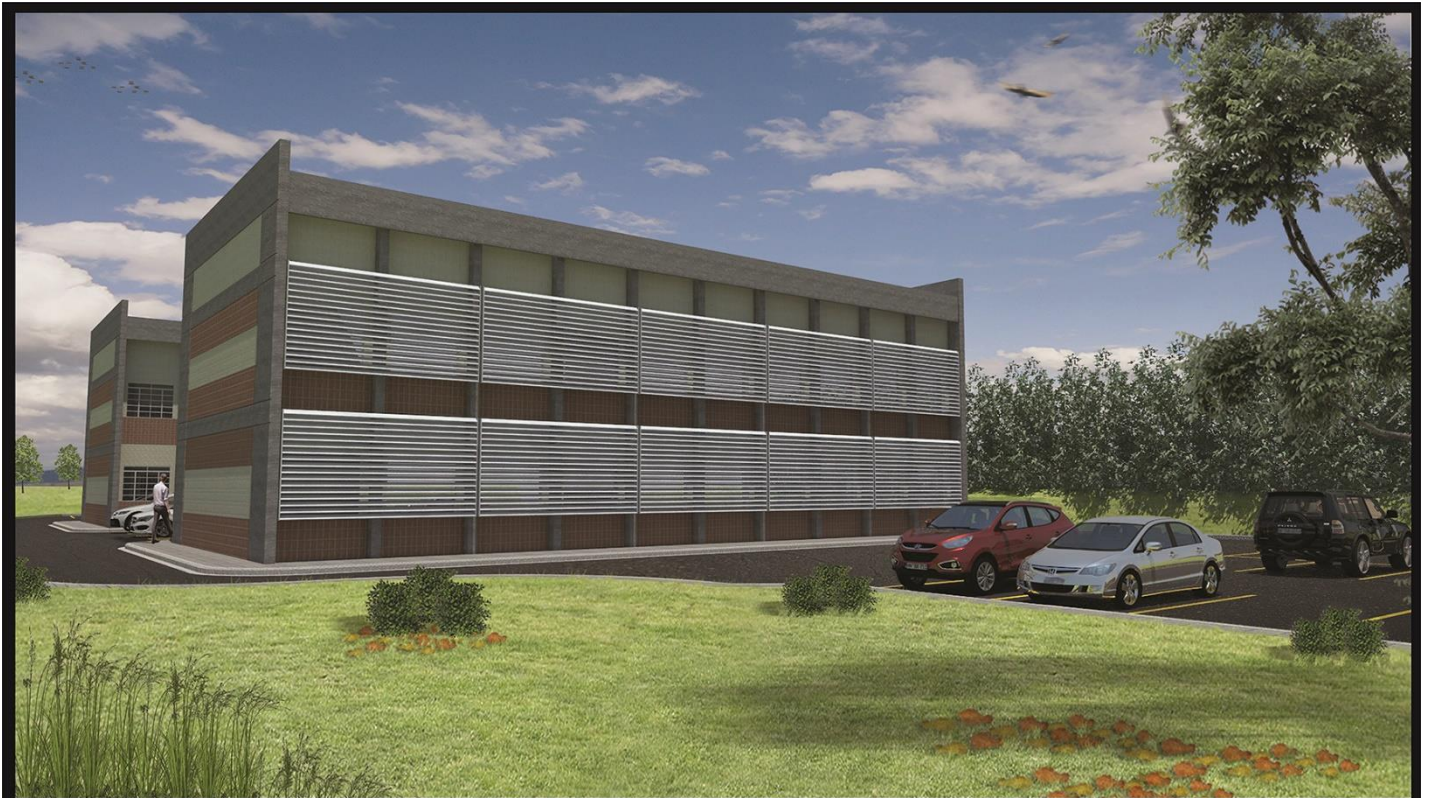

 **FAMPC**  
Fábrica de Amostras de Medicamentos

 Projeto  
Arq<sup>ta</sup> Camilla Biondo  
Engen<sup>h</sup> Ailton e Gleidson

**Additional file 4.** Lateral 3D image of the CDMO of CEVAP/UNESP.
